# Supplementary material for: A Systematic Review and Meta-Analysis of the Effect of Pentagalloyl Glucose Administration on Aortic Expansion in Animal Models
Source: MDPI journal article supplement (doi:10.3390/biomedicines9101442), 2021-10-11
Supplement: s1 [file s1]

## Supplementary material

**Supplementary table S1: Leave-one-out sensitivity analysis of studies reporting aortic expansion through direct measurement**

| Sensitivity analysis      | Effect  | LLCI     | ULCI    | I2    | Heterogeneity contribution | Influence effect size |
|---------------------------|---------|----------|---------|-------|----------------------------|-----------------------|
| Omitting Dhital 2020      | -56.608 | -101.76  | -11.456 | 0.894 | 17.591                     | 7.354                 |
| Omitting Isenburg 2007b   | -74.161 | -120.985 | -27.336 | 0.901 | 17.579                     | 3.861                 |
| Omitting Isenburg 2007a   | -71.912 | -120.305 | -23.519 | 0.912 | 12.86                      | 0.426                 |
| Omitting Schack 2020b     | -79.939 | -114.861 | -45.018 | 0.915 | 12.272                     | 3.173                 |
| Omitting Nosoudi 2016 (1) | -56.968 | -102.245 | -11.691 | 0.916 | 10.044                     | 2.09                  |
| Omitting Nosoudi 2016 (2) | -60.389 | -108.294 | -12.485 | 0.929 | 1.512                      | 0.129                 |
| Omitting Schack 2020a     | -62.932 | -111.674 | -14.19  | 0.93  | 0.141                      | 0.005                 |

LLCI = Lower limit confidence intervals; ULCI = Upper limit confidence intervals

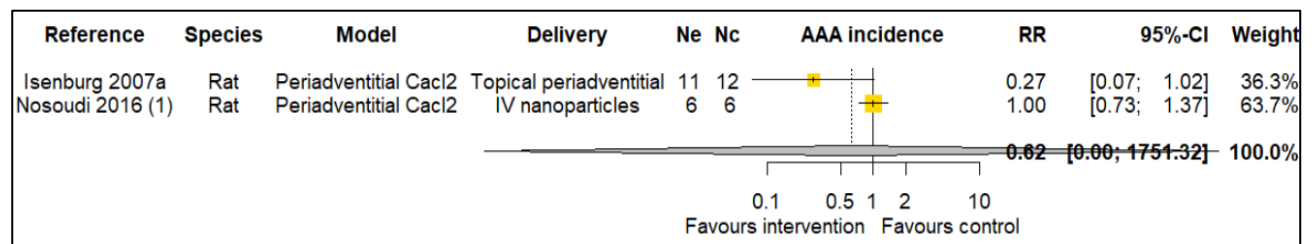

**Supplementary figure S1: Meta-analysis of studies testing the effect of pentagalloyl glucose on AAA incidence.** RR = Relative risk; Ne = Number of animals in experimental group; Nc = Number of animals in control group; CI = Confidence interval.
